# Supplementary material
Source: PubMed Central journal article supplement (PMC3331791)
Supplement: NIHMS360375-supplement-sup_data.pdf [file NIHMS360375-supplement-sup_data.pdf]

Box 1. American Joint Cancer Committee/Union for International Cancer Control 7th edition  
TNM staging for intrahepatic cholangiocarcinoma

**Primary tumor (T)c:**

- TX Primary tumor cannot be assessed
- T0 No evidence of primary tumor
- Tis Carcinoma *in situ* (intraductal tumor)
- T1 Solitary tumor without vascular invasion
- T2a Solitary tumor with vascular invasion
- T2b Multiple tumors, with or without vascular invasion
- T3 Tumors perforating the visceral peritoneum OR involving local hepatic structures by direct invasion
- T4 Tumor with periductal invasion

**Regional lymph nodes (N):**

- NX Regional lymph nodes cannot be assessed
- N0 No regional lymph node metastases
- N1 Regional lymph node metastases present

**Distant metastases (M):**

- M0 No distant metastases
- M1 Distant metastases present

**Anatomic stage/prognostic groups:**

|           |       |       |    |
|-----------|-------|-------|----|
| Stage 0   | Tis   | N0    | M0 |
| Stage I   | T1    | N0    | M0 |
| Stage II  | T2    | N0    | M0 |
| Stage III | T3    | N0    | M0 |
| Stage IVA | T4    | N0    | M0 |
|           | Any T | N1    | M0 |
| Stage IVB | Any T | Any N | M1 |

Permission obtained from Wiley-Blackwell © Sobin, L. H. *et al.* (Eds) TNM Classification of Malignant Tumours, 7th Edition (Wiley-Blackwell, Oxford, 2009).

Box 2. Liver Cancer Study Group of Japan (LCSGJ) staging system for intrahepatic cholangiocarcinoma

**Prognostic criteria:**

- 1 Tumor size  $\leq 2$ cm
- 2 Tumor number: 1
- 3 No portal vein, hepatic vein or serosal invasion

- T1 All three criteria  
T2 Two of three criteria  
T3 One of three criteria  
T4 None of three criteria

- N0 No lymph node metastases  
N1 Lymph node metastases

- M0 No distant metastases  
M1 Distant metastases

- Stage I T1N0M0  
Stage II T2N0M0  
Stage III T3N0M0  
Stage IVA T4N0M0  
Stage IVB Any T, any NM

Permission obtained from Springer © Yamasaki, S. *J. Hepatobiliary Pancreat. Surg.* 10, 288–291 (2003).

Box 3. National Cancer Center in Japan (NCCJ) staging system for mass-forming intrahepatic cholangiocarcinoma

**Primary tumor (T):**

- T1 Solitary tumor without vascular invasion
- T2 Solitary tumor with vascular invasion
- T2 Multiple tumors with or without vascular invasion

**Regional lymph nodes (N):**

- N0 No regional lymph node metastases
- N1 Regional lymph node metastases

**Distant metastases (M):**

- M0 No distant metastases
- M1 Distant metastases present

**Stage grouping:**

|            |       |       |    |
|------------|-------|-------|----|
| Stage I    | T1    | N0    | M0 |
| Stage II   | T2    | N0    | M0 |
| Stage IIIA | T3    | N0    | M0 |
| Stage IIIB | Any T | N1    | M0 |
| Stage IV   | Any T | Any N | M1 |

Permission obtained from John Wiley and Sons © Okabayashi, T. *et al. Cancer* **92**, 2374–2383 (2001).

Box 4. American Joint Cancer Committee/Union for International Cancer Control 7th edition TNM staging for perihilar cholangiocarcinoma

**Primary tumor (T)c:**

- Tx Primary tumor cannot be assessed
- T0 No evidence of primary tumor
- Tis Carcinoma *in situ*
- T1 Tumor confined to the bile duct, with extension up to the muscle layer or fibrous tissue
- T2A Tumor invades beyond the wall of the bile duct to surrounding adipose tissue
- T2B Tumor invades adjacent hepatic parenchyma
- T3 Tumor invades unilateral branches of the portal vein or hepatic artery
- T4 Tumor invades main portal vein or its branches bilaterally; or the common hepatic artery; or the second-order biliary radical bilaterally; or unilateral second order biliary radicals with contralateral portal vein or hepatic artery involvement

**Regional lymph nodes (N):**

- NX Regional lymph nodes cannot be assessed
- N0 No regional lymph node metastases
- N1 Regional lymph node metastases present (including nodes along the cystic duct, common bile duct, hepatic artery, and portal vein)
- N2 Metastases to periaortic, pericaval, superior mesenteric artery, and/or celiac artery lymph nodes

**Distant metastases (M):**

- M0 No distant metastases
- M1 Distant metastases present

**Anatomic stage/prognostic groups:**

|            |       |       |    |
|------------|-------|-------|----|
| Stage 0    | Tis   | N0    | M0 |
| Stage I    | T1    | N0    | M0 |
| Stage II   | T2A-B | N0    | M0 |
| Stage IIIA | T3    | N0    | M0 |
| Stage IIIB | T1-3  | N1    | M0 |
| Stage IVA  | T4    | N0-1  | M0 |
| Stage IVB  | Any T | N2    | M0 |
|            | Any T | Any N | M1 |

Box 5. American Joint Cancer Committee/Union for International Cancer Control 7th edition  
TNM staging for distal extrahepatic cholangiocarcinoma

**Primary tumor (T)c:**

- TX Primary tumor cannot be assessed
- T0 No evidence of primary tumor
- Tis Carcinoma *in situ*
- T1 Tumor confined to the bile duct histologically
- T2 Tumor invades beyond the wall of the bile duct
- T3 Tumor invades the gallbladder, pancreas, duodenum, or other adjacent organs without involvement of the celiac axis, or the superior mesenteric artery
- T4 Tumor involves the celiac axis, or the superior mesenteric artery

**Regional lymph nodes (N):**

- NX Regional lymph nodes cannot be assessed
- N0 No regional lymph node metastases
- N1 Regional lymph node metastases present

**Distant metastases:**

- M0 No distant metastases
- M1 Distant metastases present

**Anatomic stage/prognostic group**

|           |       |       |    |
|-----------|-------|-------|----|
| Stage 0   | Tis   | N0    | M0 |
| Stage IA  | T1    | N0    | M0 |
| Stage IB  | T2    | N0    | M0 |
| Stage IIA | T3    | N0    | M0 |
| Stage IIB | T1    | N1    | M0 |
|           | T2    | N1    | M0 |
|           | T3    | N1    | M0 |
| Stage III | T4    | Any N | M0 |
| Stage IV  | Any T | Any N | M1 |

Permission obtained from Wiley-Blackwell © Sobin, L. H. et al. (Eds) TNM Classification of Malignant Tumours, 7th Edition (Wiley-Blackwell, Oxford, 2009).

| Table 1. Memorial Sloan-Kettering Cancer Center staging system for hilar cholangiocarcinoma                              |                                                                                                                                                                                                                                                                                                                                                                       |
|--------------------------------------------------------------------------------------------------------------------------|-----------------------------------------------------------------------------------------------------------------------------------------------------------------------------------------------------------------------------------------------------------------------------------------------------------------------------------------------------------------------|
| Stage                                                                                                                    | Criteria                                                                                                                                                                                                                                                                                                                                                              |
| T1                                                                                                                       | Tumor involving biliary confluence +/- unilateral extension to second-degree biliary radicles                                                                                                                                                                                                                                                                         |
| T2                                                                                                                       | Tumor involving biliary confluence +/- unilateral extension to second-degree biliary radicles<br>AND<br>Ipsilateral portal vein involvement +/- ipsilateral hepatic lobe atrophy                                                                                                                                                                                      |
| T3                                                                                                                       | Tumor involving biliary confluence +/- unilateral extension to second-degree biliary radicles<br>OR<br>Unilateral extension to second-degree biliary radicles with contralateral portal vein involvement<br>OR<br>Unilateral extension to second-degree biliary radicles with contralateral hepatic lobe atrophy<br>OR<br>Main or bilateral portal venous involvement |
| Permission obtained from Lippincott Williams and Wilkins © Jarnagin, W. R. <i>et al. Ann. Surg.</i> 234, 507–517 (2001). |                                                                                                                                                                                                                                                                                                                                                                       |

| Table 2. Proposed clinical staging system for perihilar cholangiocarcinoma |         |                        |                    |              |
|----------------------------------------------------------------------------|---------|------------------------|--------------------|--------------|
| Criteria                                                                   | Stage   |                        |                    |              |
|                                                                            | Stage I | Stage II               | Stage III          | Stage IV     |
| <i>Mass lesions</i>                                                        | None    | Unicentric $\leq 3$ cm | Unicentric $>3$ cm | Multicentric |
| <i>Metastases</i>                                                          | None    | None                   | Perihilar LN       | Perihilar LN |
| <i>Lobar atrophy and/or vascular encasement</i>                            | No      | Yes                    | NA                 | NA           |
| <i>Jaundice resolution with stenting</i>                                   | Yes     | Yes                    | No                 | NA           |
| <i>ECOG performance status</i>                                             | 0-1     | 0-1                    | 0-1                | $\geq 2$     |

Abbreviations: ECOG, Eastern Cooperative Oncology Group; LN, lymph node; NA, not applicable. Permission obtained from Lippincott Williams and Wilkins © Blechacz, B. R. *et al.* *Curr. Opin. Gastroenterol.* **25**, 238–239 (2009).

| Table 3. Proposed staging system by Deoliveira <i>et al.</i>                                                           |                      |                                                                       |
|------------------------------------------------------------------------------------------------------------------------|----------------------|-----------------------------------------------------------------------|
| <b>und</b>                                                                                                             | <b>Side/location</b> | <b>Description</b>                                                    |
|                                                                                                                        |                      | <b>Bile duct (B) (Based on Bismuth Classification)</b>                |
| B1                                                                                                                     |                      | Common bile duct                                                      |
| B2                                                                                                                     |                      | Hepatic duct confluence                                               |
| B3                                                                                                                     | R                    | Right hepatic duct                                                    |
| B3                                                                                                                     | L                    | Left hepatic duct                                                     |
| B4                                                                                                                     |                      | Right and left hepatic duct                                           |
|                                                                                                                        |                      | <b>Tumor size (T)</b>                                                 |
| T1                                                                                                                     |                      | < 1cm                                                                 |
| T2                                                                                                                     |                      | 1 - < 3 cm                                                            |
| T3                                                                                                                     |                      | ≥ 3cm                                                                 |
|                                                                                                                        |                      | <b>Tumor Form (F)</b>                                                 |
| Scerosing                                                                                                              |                      | Scerosing (or periductal)                                             |
| Mass                                                                                                                   |                      | Mass forming (or nodular)                                             |
| Mixed                                                                                                                  |                      | Scerosing and mass forming                                            |
| Polipoid                                                                                                               |                      | Polipoid (or intraductal)                                             |
|                                                                                                                        |                      | <b>Involvement (&gt;180°) of the portal vein (PV)</b>                 |
| PV0                                                                                                                    |                      | No portal involvement                                                 |
| PV1                                                                                                                    |                      | Main Portal vein                                                      |
| PV2                                                                                                                    |                      | Portal vein bifurcation                                               |
| PV3                                                                                                                    | R                    | Right portal vein                                                     |
| PV3                                                                                                                    | L                    | Left portal vein                                                      |
| PV4                                                                                                                    |                      | Right and left portal vein                                            |
|                                                                                                                        |                      | <b>Involvement (&gt;180°) of the hepatic artery (HA)</b>              |
| HA0                                                                                                                    |                      | No arterial involvement                                               |
| HA1                                                                                                                    |                      | Proper hepatic artery                                                 |
| HA2                                                                                                                    |                      | Hepatic artery bifurcation                                            |
| HA3                                                                                                                    | R                    | Right hepatic artery                                                  |
| HA3                                                                                                                    | L                    | Left hepatic artery                                                   |
| HA4                                                                                                                    |                      | Right and left hepatic artery                                         |
|                                                                                                                        |                      | <b>Liver remnant volume (V)</b>                                       |
| V 0                                                                                                                    |                      | No information on volume needed (liver resection not foreseen)        |
| V (%)                                                                                                                  | Indicate segments    | % total volume of a putative remnant liver after resection            |
|                                                                                                                        |                      | <b>Lymph Nodes (N) (based on Japanese Society of Biliary Surgery)</b> |
| N0                                                                                                                     |                      | No lymph nodes involvement                                            |
| N1                                                                                                                     |                      | Hilar and/or hepatic artery lymph nodes involvement                   |
| N2                                                                                                                     |                      | Peri-aortic lymph nodes involvement                                   |
|                                                                                                                        |                      | <b>Metastases (M) ( Based on TNM classification(11))</b>              |
| M0                                                                                                                     |                      | No distant metastases                                                 |
| M1                                                                                                                     |                      | Distant metastases, including liver and peritoneal metastases         |
| Permission obtained from John Wiley and Sons© Deoliveira, M. L. <i>et al. Hepatology</i> <b>53</b> , 1262–1371 (2011). |                      |                                                                       |
